# Supplementary figures and images for: Clinical outcomes of non-COVID-19 orthopaedic patients admitted during the COVID-19 pandemic: a multi-centre interrupted time series analysis across hospitals in six different countries
Source: HighWire-hosted journal article supplement (doi:10.1136/bmjopen-2023-073276), 2023-09-01

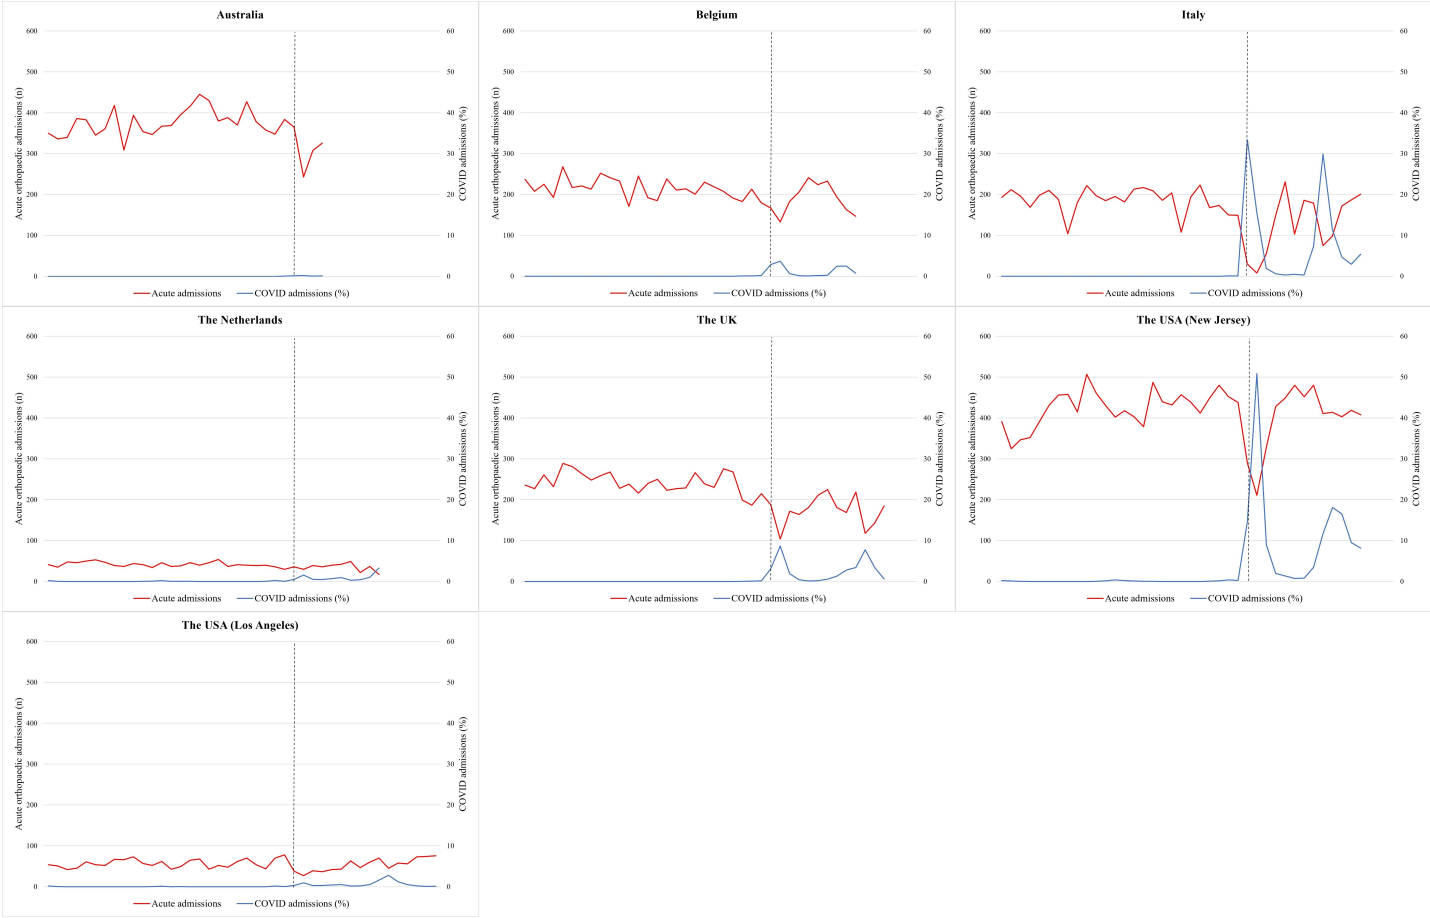

Supplement: bmjopen-2023-073276supp002_data_supplement.pdf [file bmjopen-2023-073276supp002_data_supplement.pdf]
